# Supplementary material for: Owls May Use Faeces and Prey Feathers to Signal Current Reproduction
Source: PLOS journal article supplement (doi:10.1371/journal.pone.0003014), 2008-08-19
Supplement: S3 (10.1371/journal.pone.0003014.s003) [file journal.pone.0003014.s003]

### S3: SPATIAL DISTRIBUTION OF FAECAL MARKINGS

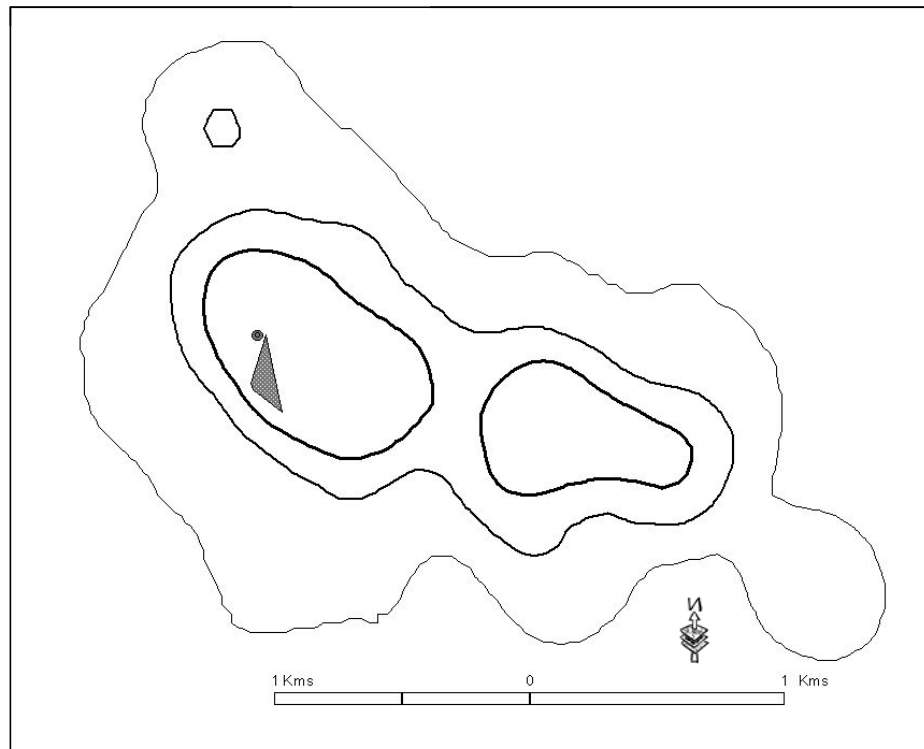

An example of the spatial distribution of faecal markings (grey triangle) within the home range of a breeding eagle owl. Defecation sites only occur in a very limited portion of the core area of the whole home range, namely the region closely surrounding the active nest (grey circle).
