# Supplementary material for: Owls May Use Faeces and Prey Feathers to Signal Current Reproduction
Source: PLOS journal article supplement (doi:10.1371/journal.pone.0003014), 2008-08-19
Supplement: S9 (10.1371/journal.pone.0003014.s009) [file journal.pone.0003014.s009]

## S9: FAECAL MARKS AND MATE-MATE COMMUNICATION

Some faecal marks are only visible from the nest (in both examples shown here, the nest is on the cliff just in front of the mark), not the surroundings. Thus, these markings could signal reproductive status in communications between breeding partners (e.g. the location of preferred nest placement).

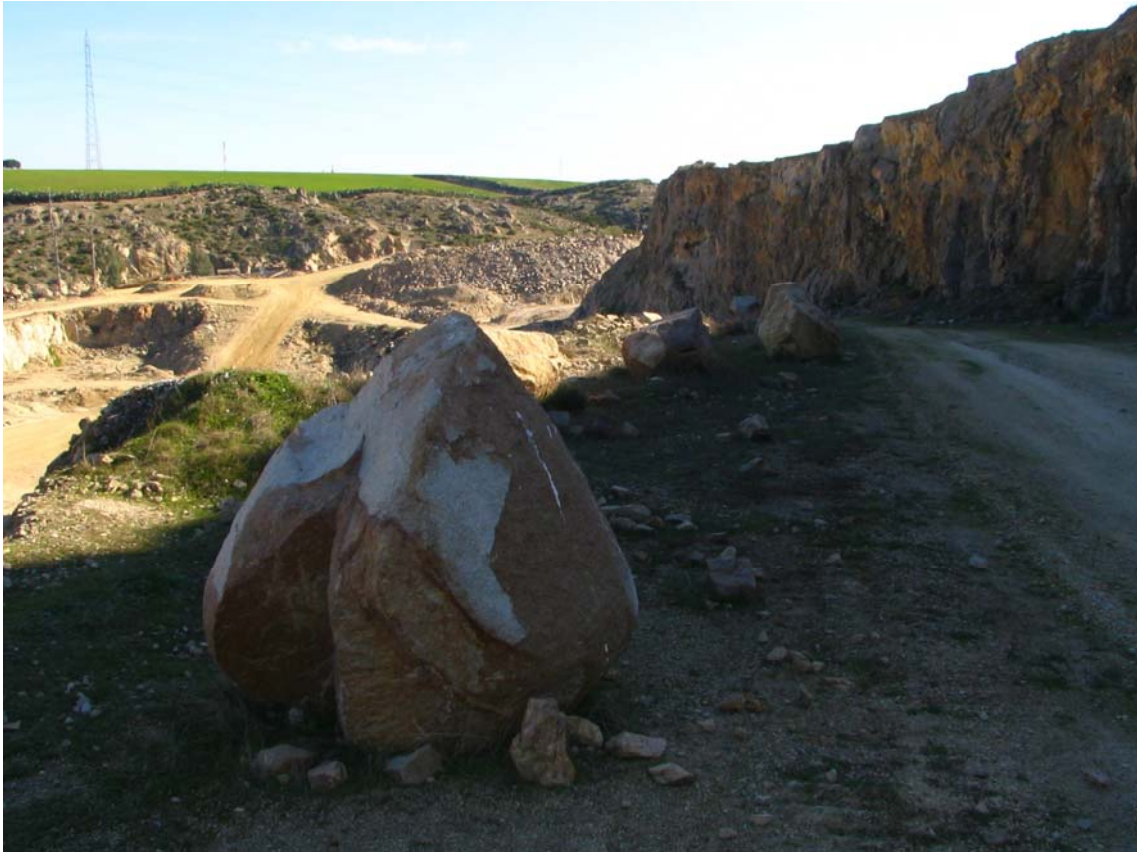

A

## S9: FAECAL MARKS AND MATE-MATE COMMUNICATION

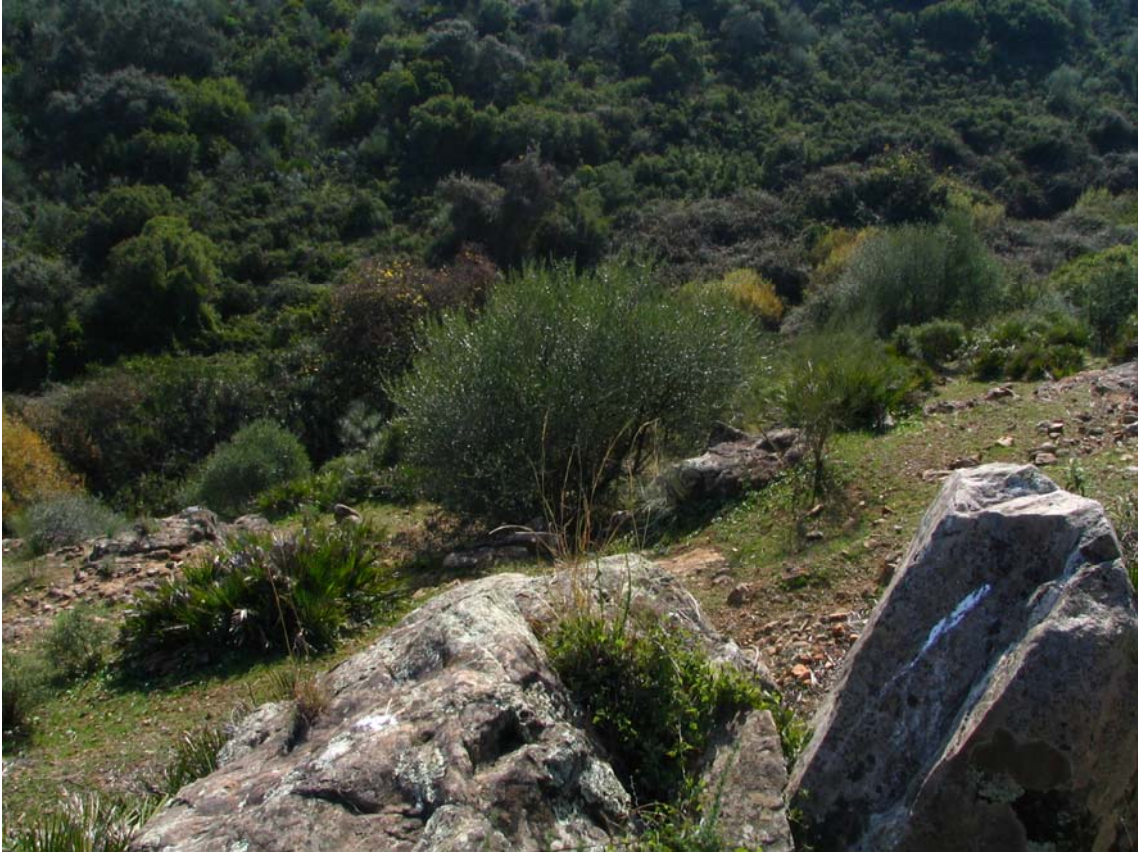

**B**
